# Supplementary material
Source: PubMed Central journal article supplement (PMC2978557)
Supplement: supp_M110.156950_jbc.M110.156950-1.pdf [file supp_M110.156950_jbc.M110.156950-1.pdf]

O-glycosylation Modulates Proprotein Convertase Activation of Angiopoietin-Like Protein 3 -  
Possible Role of GALNT2 in Regulation of HDL and TG

**Supplemental Data**

**Suppl. Table 1.** List of product ions from ETD-MS<sup>2</sup> of ANGPTL3+1Tn precursors (MH<sub>4</sub><sup>4+</sup>, 200 ms reaction time, and MH<sub>3</sub><sup>3+</sup>, 150 ms reaction time) in LTQ-Orbitrap, with deviations of experimental from theoretical *m/z* values (err, in ppm) calculated by Protein Prospector (<http://prospector.ucsf.edu/>) MS-Product program for HexNAc at Thr8.

|                                    | calc.     | 404.4780 <sup>4+</sup><br>exp. | err (ppm) | 538.9697 <sup>3+</sup><br>exp. | error (ppm) |
|------------------------------------|-----------|--------------------------------|-----------|--------------------------------|-------------|
| c <sub>2</sub>                     | 243.1816  | 243.1843                       | 11        |                                |             |
| z <sub>2</sub>                     | 244.1418  | 244.1446                       | 12        |                                |             |
| c <sub>5</sub> <sup>2+</sup>       | 284.1899  | 284.1923                       | 8.4       |                                |             |
| c <sub>6</sub> <sup>2+</sup>       | 362.2405  | 362.2424                       | 5.3       |                                |             |
| z <sub>3</sub>                     | 391.2102  | 391.2121                       | 4.9       |                                |             |
| c <sub>3</sub>                     | 399.2827  | 399.2845                       | 4.6       | 399.2846                       | 4.9         |
| c <sub>7</sub> <sup>2+</sup>       | 412.7643  | 412.7661                       | 4.4       |                                |             |
| z <sub>7</sub> <sup>2+</sup>       | 525.2739  | 525.2739                       | 1.7       |                                |             |
| c <sub>5</sub>                     | 567.3725  | 567.3737                       | 2.0       | 567.3738                       | 2.2         |
| z <sub>9</sub> <sup>2+</sup>       | 609.3180  | 609.3191                       | 1.9       |                                |             |
| [c <sub>9</sub> -1] <sup>2+</sup>  | 612.8503  |                                |           | 612.8513                       | 1.6         |
| c <sub>9</sub> <sup>2+</sup>       | 613.3542  | 613.3550                       | 1.3       |                                |             |
| [c <sub>10</sub> -1] <sup>2+</sup> | 686.3845  |                                |           | 686.3854                       | 1.3         |
| c <sub>10</sub> <sup>2+</sup>      | 686.8884  | 686.8889                       | 0.7       |                                |             |
| z <sub>10</sub> <sup>2+</sup>      | 687.3685  | 687.37                         | 2.2       |                                |             |
| c <sub>6</sub>                     | 723.4737  | 723.4741                       | 0.6       | 723.4742                       | 0.8         |
| c <sub>6</sub> +1                  | 723.4770  | 724.4813                       | 5.9       |                                |             |
| c <sub>11</sub> <sup>2+</sup>      | 743.4304  |                                |           | 743.4310                       | 0.7         |
| [c <sub>11</sub> +1] <sup>2+</sup> | 743.9321  | 743.9341                       | 2.7       |                                |             |
| z <sub>5</sub> *                   | 792.3900  | 792.3917                       | 2.1       |                                |             |
| c <sub>7</sub>                     | 824.5213  | 824.5213                       | 0.0       | 824.5212                       | 0.2         |
| c <sub>7</sub> +1                  | 825.5247  | 825.5279                       | 3.9       |                                |             |
| z <sub>6</sub>                     | 893.4377  | 893.4374                       | -0.3      |                                |             |
| z <sub>7</sub>                     | 1049.5388 | 1049.5380                      | -0.7      | 1049.5385                      | -0.3        |
| z <sub>7</sub> +1                  | 1050.5466 | 1050.5448                      | -1.7      |                                |             |
| z <sub>9</sub>                     | 1217.6287 | 1217.6266                      | -1.7      | 1217.6276                      | -0.9        |
| z <sub>9</sub> +1                  | 1218.6365 | 1218.6343                      | -1.8      |                                |             |
| c <sub>9</sub>                     | 1225.7011 | 1225.6991                      | -1.7      | 1225.6994                      | -1.4        |
| c <sub>9</sub> +1                  | 1226.7045 | 1226.7057                      | 1.0       |                                |             |
| c <sub>10</sub>                    | 1372.7696 | 1372.7668                      | -2.0      | 1372.7670                      | -1.9        |
| c <sub>10</sub> +1                 | 1373.7729 | 1373.7751                      | 1.6       |                                |             |
| z <sub>10</sub> +1                 | 1374.7376 | 1374.7141                      | -17       |                                |             |
| c <sub>10</sub>                    | 1485.8536 | 1485.8505                      | -2.1      |                                |             |
| c <sub>11</sub> +1                 | 1486.8570 | 1486.8583                      | 0.9       | 1486.8577                      | 0.5         |
| c <sub>11</sub> +2                 | 1487.8603 | 1487.8655                      | 3.5       |                                |             |

\*Observed at 100 ms ETD reaction time.
